# Supplementary material for: Pb4Br113− cluster as a fluorescent indicator for micro water content in aprotic organic solvents
Source: Royal Society of Chemistry journal article supplement (doi:10.1039/b817787b), 2009-01-01
Supplement: b817787b.pdf [file b817787b.pdf]

## Electronic Supplementary Information

### Pb<sub>4</sub>Br<sub>11</sub><sup>3-</sup> Cluster as a Fluorescent “Ruler” for Micro Water Content in Aprotic Organic Solvents

Shun-Hua Li\*, Fei-Ran Chen, Yue-Feng Zhou and Jin-Gou Xu\*

#### 1. Reagents

Acetonitrile used for the spectroscopic measurements was purchased from Aldrich Chemical Co. as ‘anhydrous’ grade (water content <0.001%). THF was distilled over sodium/benzophenone under a dry nitrogen atmosphere immediately prior to use. Acetone and DMSO were distilled over CaH<sub>2</sub> under a nitrogen atmosphere and stored over molecular sieves (4 Å) for at least 12 h. All other reagents including the undydrated lead(II) salts and tetraalkylammonium bromides were of analytical grade or better and used without further purification.

A typical preparation of luminescent crystals of the Pb<sub>4</sub>Br<sub>11</sub><sup>3-</sup> cluster ensemble was described as follows. Tetrabutylammonium bromide (129 mg, 0.4 mmol) with lead(II) nitrate (13 mg, 0.04 mmol) were dissolved in 25 mL acetonitrile. After addition of tetraethylammonium bromide (84 mg, 0.4 mmol), the mixture was shaken to give a clear colorless solution. This solution was kept quiescent over night and the crystals of Pb<sub>4</sub>Br<sub>11</sub><sup>3-</sup> cluster appeared as colorless needles. The volume of the solvent was reduced by volatilization in air. The crystals were collected and air dried for fluorescent photomicrograph studies. XPS spectrum of the Pb<sub>4</sub>Br<sub>11</sub><sup>3-</sup> crystal was not available in the attempt due to its meltability at high temperature.

Lead (II) in polar organic solvents with bromide in excess generates the highly luminescent lead-halide cluster Pb<sub>4</sub>Br<sub>11</sub><sup>3-</sup>. Although the cluster ensemble was not strictly characterized due to its peculiar existence condition, absorption and fluorescence measurements performed in acetonitrile were in accord with what had been previously observed (Ref. 10-12).

#### 2. Water dependences of the fluorescence spectra of Pb<sub>4</sub>Br<sub>11</sub><sup>3-</sup> in acetonitrile

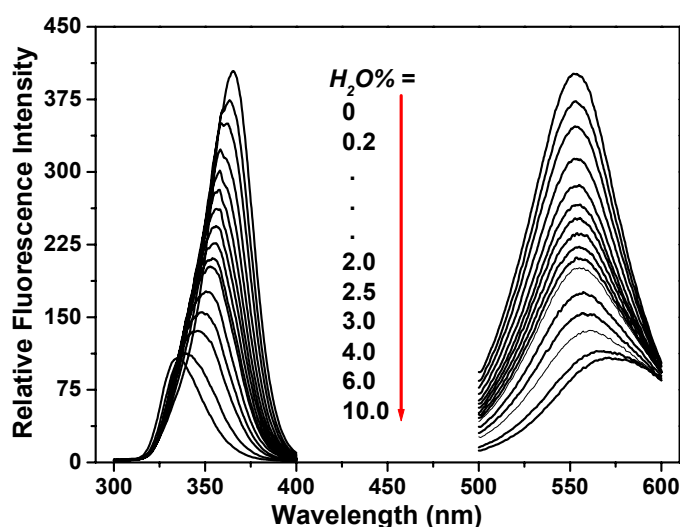

**Fig. 1** Water dependences of the fluorescence spectra of Pb<sub>4</sub>Br<sub>11</sub><sup>3-</sup> cluster ensemble ( $4.0 \times 10^{-4}$  mol L) formed by lead(II) nitrate and tetrabutylammonium bromide with a  $n_{Br}/n_{Pb}$  ratio of 20 in acetonitrile at room temperature.

### 3. Effects of water pH and solution temperature on the water-sensing responses of $\text{Pb}_4\text{Br}_{11}^{3-}$

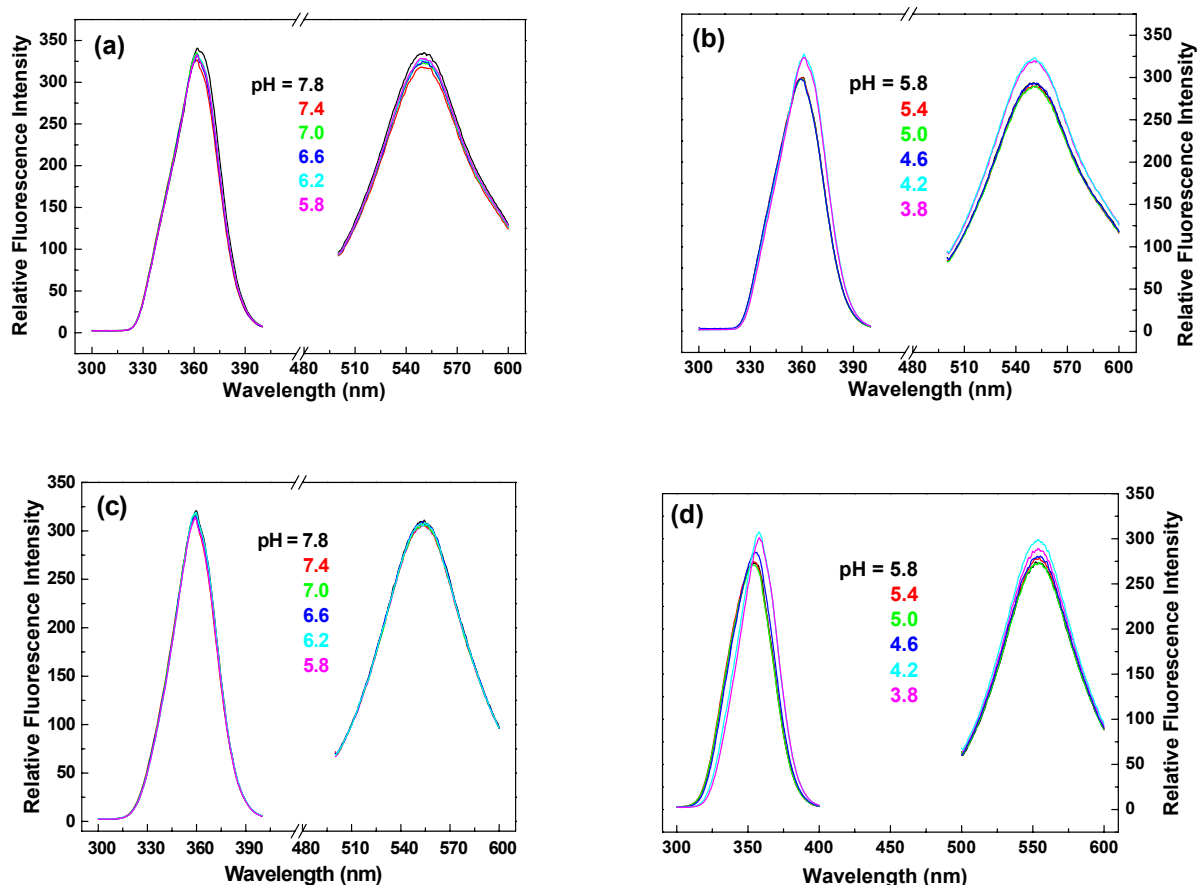

**Fig. 2** Effects of water pH on the fluorescence spectra of  $\text{Pb}_4\text{Br}_{11}^{3-}$  cluster ensemble (a-b,  $2.0 \times 10^{-4}$  mol L in acetone; c-d,  $3.0 \times 10^{-4}$  mol L in acetonitrile) formed by lead(II) nitrate and tetrabutylammonium bromide with a  $n_{\text{Br}^-}/n_{\text{Pb}^{2+}}$  ratio of 20. Water content: 1.0%, V/V (a, b, c, d); pH of water: buffered by  $\text{NaH}_2\text{PO}_4 - \text{Na}_2\text{HPO}_4$  (a, c) and  $\text{NaAc} - \text{HAc}$  (b, d) at 0.20 mol L.

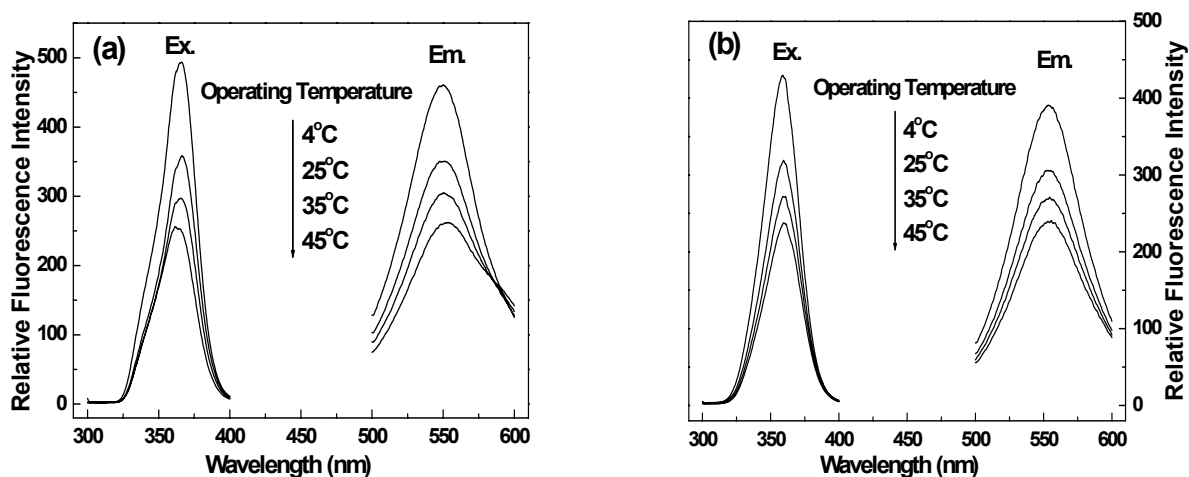

**Fig. 3** Effects of solution temperature on the water-sensing responses of  $\text{Pb}_4\text{Br}_{11}^{3-}$  cluster ensemble (a,  $2.0 \times 10^{-4}$  mol L in acetone; b,  $3.0 \times 10^{-4}$  mol L in acetonitrile) formed by lead(II) nitrate and tetrabutylammonium bromide with a  $n_{\text{Br}^-}/n_{\text{Pb}^{2+}}$  ratio of 20. Water content: 1.0%, V/V (a, b).

#### 4. Influences of the concentration and $n_{Br}/n_{Pb}$ ratio of $Pb_4Br_{11}^{3-}$ on the water-sensing sensitivity

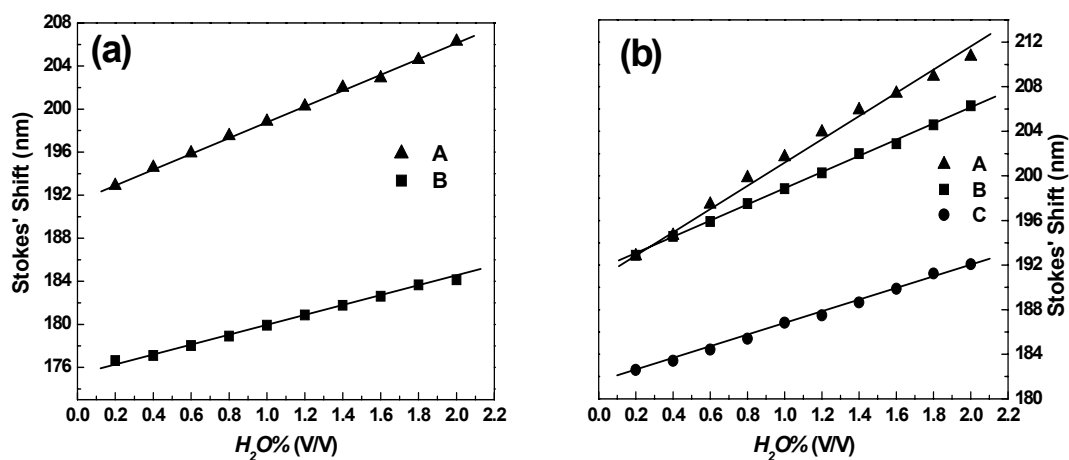

**Fig. 4** Influences of the concentration (a) and  $n_{Br}/n_{Pb}$  ratio (b) of  $Pb_4Br_{11}^{3-}$  clusters on the water-sensing sensitivity.  $Pb_4Br_{11}^{3-}$  clusters were formed by lead(II) nitrate and tetrabutylammonium bromide in acetonitrile. (a) Different concentrations of  $Pb_4Br_{11}^{3-}$  with a constant  $n_{Br}/n_{Pb}$  ratio of 20: A,  $3.0 \times 10^{-4}$  mol L; B,  $8.0 \times 10^{-4}$  mol L. (b) Different  $n_{Br}/n_{Pb}$  ratios of  $Pb_4Br_{11}^{3-}$  at a constant concentration of  $3.0 \times 10^{-4}$  mol L: A, 15; B, 20; C, 40.

#### 5. Effect of reaction time on the water-sensing responses of $Pb_4Br_{11}^{3-}$

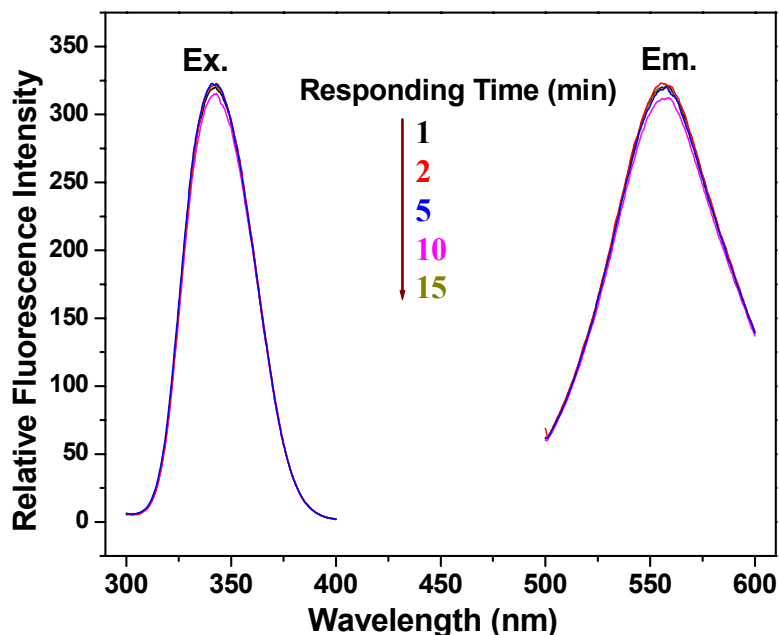

**Fig. 5** Effect of reaction time on the water-sensing response of  $Pb_4Br_{11}^{3-}$  cluster ensemble ( $4.0 \times 10^{-4}$  mol L) formed by lead(II) acetate and tetrabutylammonium bromide with a  $n_{Br}/n_{Pb}$  ratio of 20 in acetonitrile at room temperature. Water content: 1.0%, V/V.
